# Supplementary material for: Predicting nanocarrier permeation across the human intestine in vitro: model matters
Source: Royal Society of Chemistry journal article supplement (doi:10.1039/d4bm01092b), 2024-01-01
Supplement: d4bm01092b1.pdf [file d4bm01092b1.pdf]

## Supporting Information

### Predicting nanocarrier permeation across the human intestine *in vitro*: Model matters

Nathalie Jung<sup>1\*</sup>, Jonas Schreiner<sup>1</sup>, Florentin Baur<sup>1</sup>, Sarah Vogel-Kindgen<sup>1</sup>, Maike Windbergs<sup>1\*</sup>

<sup>1</sup> Institute of Pharmaceutical Technology, Goethe University Frankfurt, 60438 Frankfurt am Main, Germany

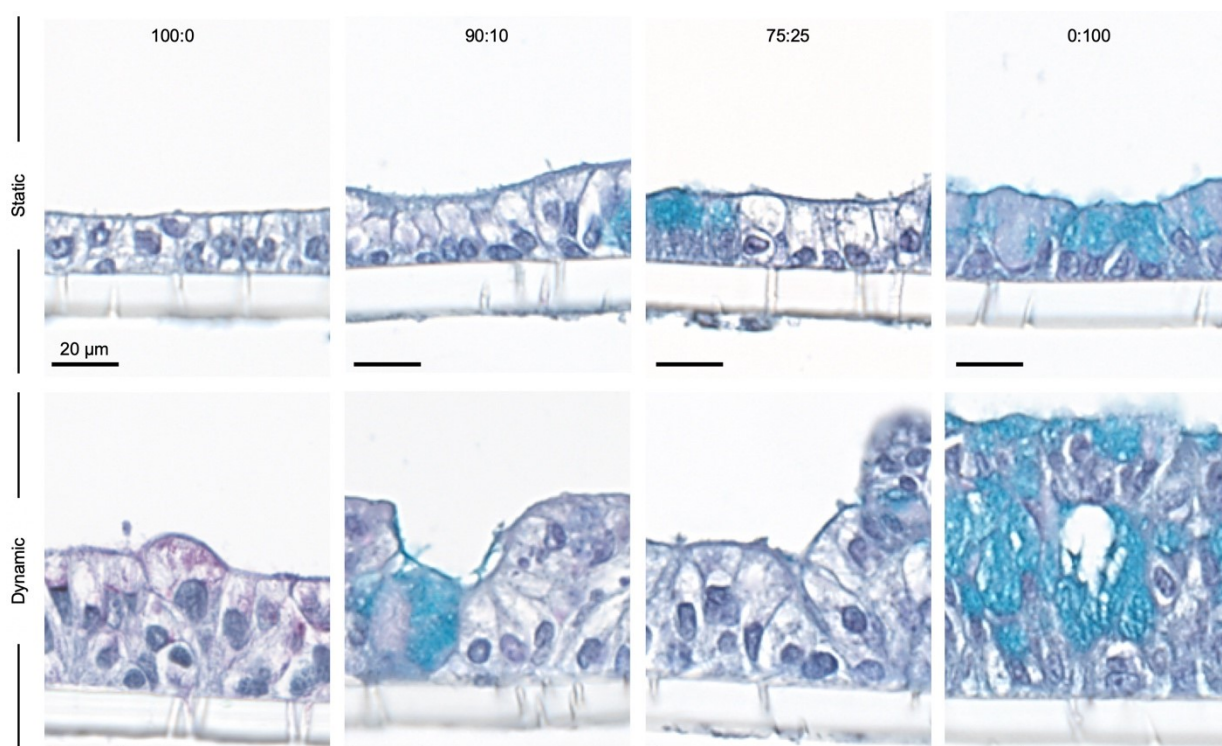

**Figure S1: Histology details.** Magnification of alcian blue/PAS staining of histological sections of *in vitro* tissue models cultured under static or dynamic conditions. Scale bars: 20 µm.

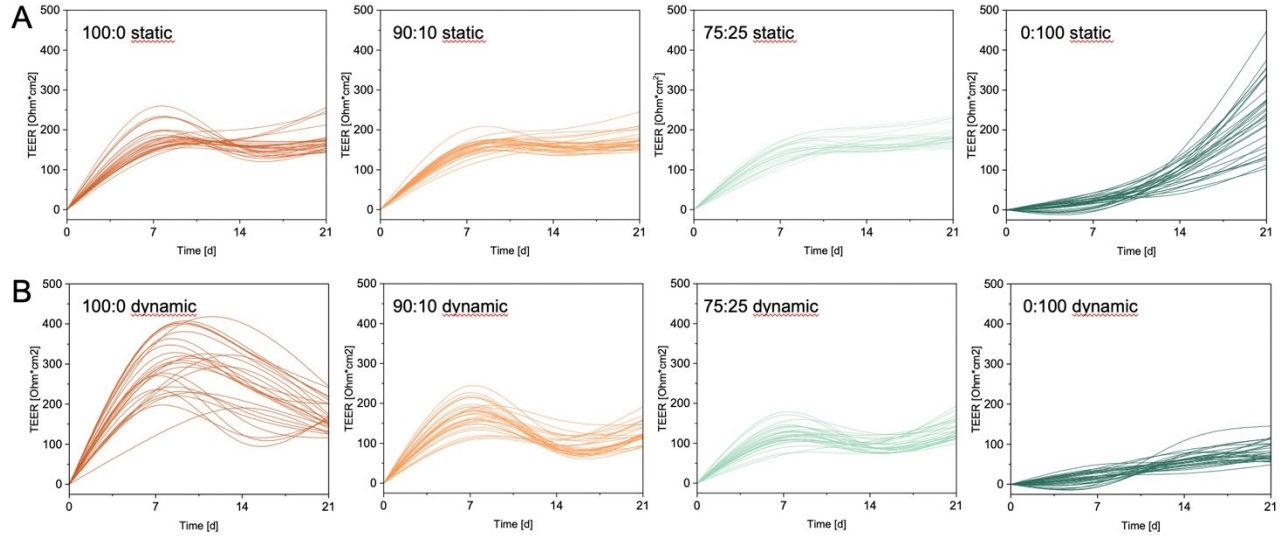

**Figure S2: Development of transepithelial electrical resistance (TEER).** Single TEER values of different *in vitro* models over 21 days. Each line in the spline graphs represents a single culture of the respective *in vitro* model.

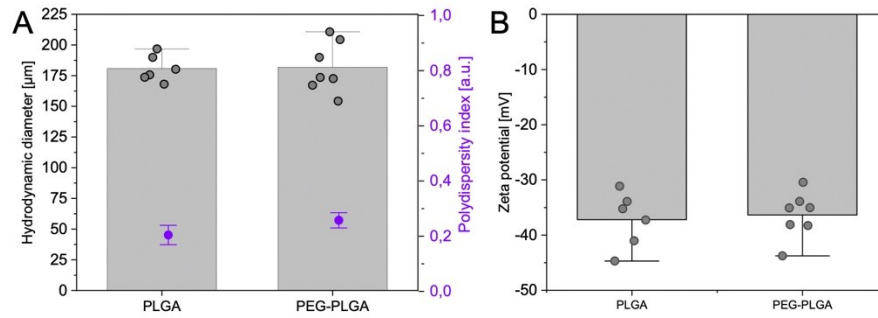

**Figure S3: Nanocarrier characterisation.** Nanocarrier hydrodynamic diameter, polydispersity index (A) and surface charge (B).

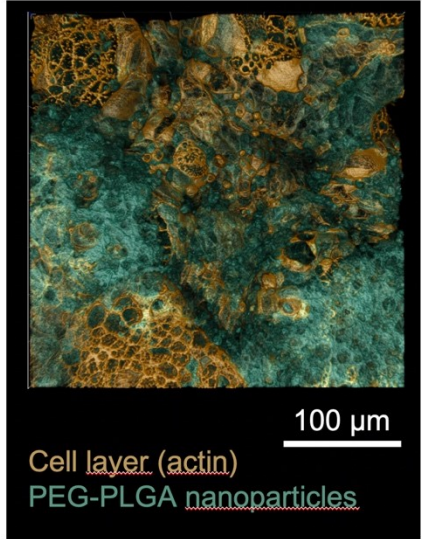

**Figure S4: Fluorescence staining in *in vitro* model after permeation experiment.** Confocal fluorescence image of dynamic 75:25 culture after transport study with PEG-PLGA nanocarriers.

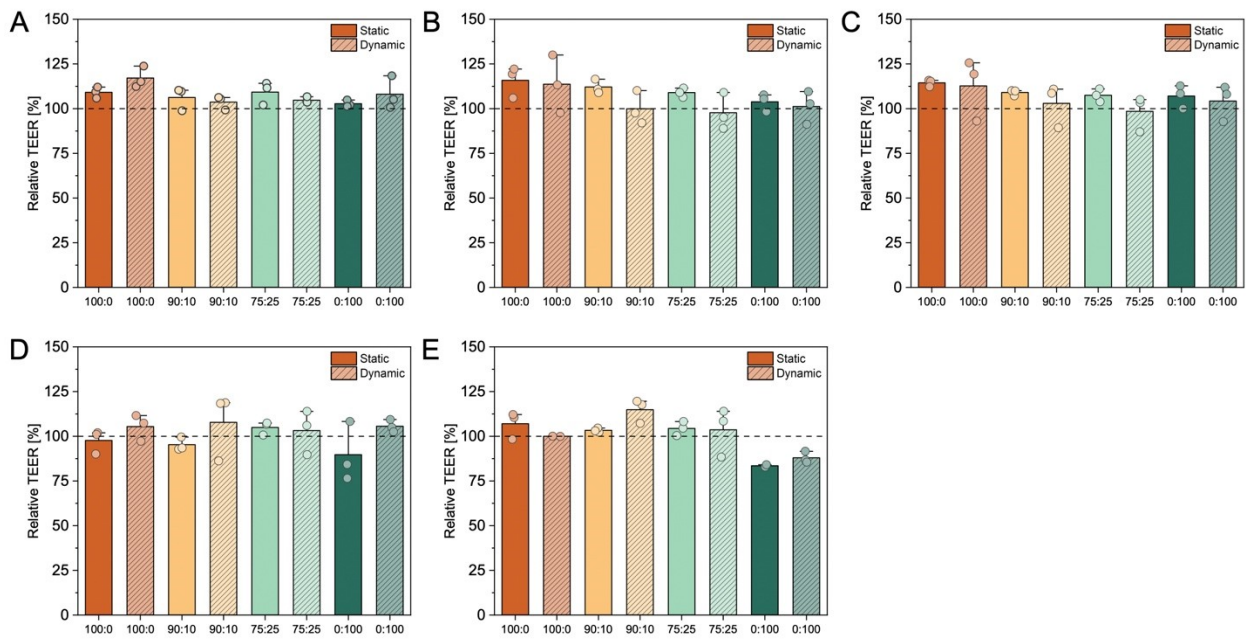

**Figure S5: Investigation of adverse effects of FITC-dextran and nanocarriers.** Relative transepithelial electrical resistance (TEER) after permeation testing of 4 kDa FITC-dextran (A), PLGA nanocarriers (B), and PEG-PLGA nanocarriers (C). Cell viability of different *in vitro* models after 24 h incubation with PLGA nanocarriers (D) and PEG-PLGA nanocarriers (E).
